# Supplementary material for: Land use change affects soil methane sink capacity of Brazilian biomes
Source: Research Square preprint supplement (doi:10.21203/rs.3.rs-6630160/v1), 2025-06-18
Supplement: Supplementary file 1 [file cd7d2b4c3bb07dcf9c4ca1c1.docx]

**Land use change affects soil methane sink capacity of Brazilian biomes**

Leonardo Machado Pitomboa, Helio Danilo Quevedob, Diana Signorc, Claudia Fernanda AlmeidaTeixeira-Gandrad, Ricardo Hideo Taniwakie, Cimélio Bayerf, Paul L. E. Bodelierg, Janaina Braga do Carmogh*

aSaneamento de Goiás S/A, 72874-101, Valparaíso de Goiás, GO, Brazil

bFederal University of São Carlos (UFSCar) Sorocaba campus– Graduate Program of Planning and Use of Renewable Resources, Rod. João Leme dos Santos Km 110, 18052-780, Sorocaba, SP, Brazil

cLaboratory of organic matter, Embrapa Semiárido, 52302-970, Petrolina-Pernambuco, Brazil

dFederal University of Pelotas/Centro de Engenharias, Pelotas, RS, Brazil

eFederal University of ABC - Center for Engineering, Modeling and Applied Social Sciences, Santo Andre campus, São Paulo, Brazil

fDepartment of Soil Science, Faculty of Agronomy, Universidade Federal do Rio Grande do Sul, Porto Alegre 91540-000, Brazil

gDepartment of Microbial Ecology, Netherlands Institute of Ecology (NIOO-KNAW), Droevendaalsesteeg 10, 6708 PB Wageningen, the Netherlands

ghDepartment of Environmental Sciences, Federal University of São Carlos, Rod. João Leme dos Santos Km 110, 18052-780, Sorocaba, SP, Brazil

Suplemental Material 1 – Coordinate of studied areas

| **site** | **coordinate** |
| --- | --- |
| Araras | 22º2’59,7’S; 47º30’13,0’W |
| Sorocaba | 22º2’59,7”S; 47º30’13,0”W |
| Brasília | 15°36'45.0"S 47°44'22.3"W |
| Itirapina | 22° 17’18.65’’S 47°54’3.41’’W |
| Porto Alegre | -30.09957, -51681657 |
| Pelotas | 31º51’05.7”S 52º16’38.3”W |
| São Luiz | 23º19’22.0”S; 45º05’43.6” W |
| Aiuruoca | 22°1'5"S44°39'24"W |
| São João | 5º 07’ 46,3”S 37º 29’ 40,7”W |
| Petrolina | -9.326184, -40.508542 |
| Mossoró | 5º 07’46,3”S37º 29’40,7”W |

Supplemental Material 2 – Consumption of CH4, Chemistry and Soil Texture.

| **Site** | **Land Use** | **Flux of C-CH4**  **(µg kg soil-1day-1)** | **pH** | **NH4 +**  **(mg/kg)** | **NO3-**  **(mg/kg)** | **Sand**  **(%)** | **Clay**  **(%)** | **Silt**  **(%)** |
| --- | --- | --- | --- | --- | --- | --- | --- | --- |
| Araras | Natural | -23,7 ± 0,5 | 6,1 | 7,5 | 24,6 | 31,2 | 52,5 | 16,3 |
| Agricultural | 0,4 ± 0,2 | 4,7 | 5,5 | 2,7 | 44,7 | 47,8 | 7,5 |
| Sorocaba | Natural | 0,2 ± 0,1 | 6,4 | 1,0 | 49,9 | 34,3 | 53,4 | 12,3 |
| Agricultural | 0,3 ± 0,1 | 5,0 | 1,4 | 9,2 | 51,9 | 35,5 | 12,7 |
| Brasília | Natural | -24,0 ±0,8 | 4,2 | 8,0 | 6,6 | 44,0 | 50,0 | 6,0 |
| Agricultural | -0,7 ±0,1 | 5,0 | 8,8 | 21,7 | 48,6 | 43,1 | 8,3 |
| Itirapina | Natural | -3,4 ± 0,6 | 3,9 | 6,4 | 1,7 | 90,8 | 7,4 | 1,8 |
| Agricultural | -0,2 ± 0,3 | 5,3 | 1,9 | 1,0 | 91,2 | 2,5 | 6,3 |
| Porto Alegre | Natural | -6,5 ± 0,3 | 4,3 | 1,2 | 4,9 | 47,7 | 24,0 | 28,3 |
| Agricultural | -0,2 ± 0,1 | 4,4 | 7,1 | 9,0 | 47,4 | 23,8 | 28,7 |
| Pelotas | Natural | -1,3 ± 0,2 | 4,1 | 2,2 | 0,7 | 83,2 | 8,8 | 8,0 |
| Agricultural | 0,2 ± 0,2 | 5,8 | 1,4 | 1,4 | 87,7 | 6,7 | 5,6 |
| São Luiz | Natural | -3,4 ± 0,1 | 3,8 | 4,9 | 41,0 | 64,2 | 24,1 | 11,7 |
| Agricultural | 0,1 ± 0,1 | 6,2 | 0,9 | 16,4 | 66,5 | 17,5 | 15,9 |
| Aiuruoca | Natural | -20,5 ± 1,1 | 3,9 | 13,3 | 7,8 | 72,5 | 24,1 | 3,4 |
| Agricultural | 0,2 ± 0,3 | 6,9 | 5,8 | 30,7 | 57,7 | 37,7 | 4,5 |
| São João | Natural | 1,3 ± 0,8 | 4,0 | 9,5 | 4,1 | 90,1 | 2,5 | 7,4 |
| Agricultural | 0,1 ± 0,2 | 4,7 | 3,7 | 3,3 | 91,9 | 2,7 | 5,4 |
| Petrolina | Natural | 0,1 ± 0,2 | 4,5 | 0,5 | 10,1 | 80,0 | 7,7 | 12,3 |
| Agricultural | 0,2 ± 0,2 | 6,4 | 0,3 | 23,6 | 88,8 | 4,7 | 6,5 |
| Mossoró | Natural | 0,2 ± 0,2 | 6,2 | 0,1 | 16,6 | 51,4 | 39,6 | 9,0 |
| Agricultural | 0,1 ± 0,2 | 6,9 | 0,2 | 16,6 | 51,5 | 40,9 | 7,6 |
